# Supplementary material for: Cation–π-induced mixed-matrix nanocomposite for the detection and removal of Hg2+ and azinphos-methyl towards environment remediation
Source: Royal Society of Chemistry journal article supplement (doi:10.1039/d4ew00114a), 2024-01-01
Supplement: d4ew00114a1.pdf [file d4ew00114a1.pdf]

**Cation- $\pi$ -induced mixed-matrix nanocomposite for detection and removal of Hg<sup>2+</sup> and azinphos-methyl towards environment remediation**

**Kamalpreet Kaur<sup>†</sup>, Gagandeep Singh<sup>‡</sup>, Navneet Kaur<sup>§,\*</sup>, Narinder Singh<sup>†,\*</sup>**

<sup>†</sup>Department of Chemistry, Indian Institute of Technology Ropar, Rupnagar, Punjab 140001, India

<sup>‡</sup>Department of Biomedical Engineering, Indian Institute of Technology Ropar, Rupnagar, Punjab 140001, India

<sup>§</sup>Department of Chemistry, Panjab University, Chandigarh 160014, India

**Corresponding author's E-mail:** [nsingh@iitrpr.ac.in](mailto:nsingh@iitrpr.ac.in); [navneetkaur@pu.ac.in](mailto:navneetkaur@pu.ac.in)

---

| S.No.      | Title                                                                                                                                                                                                                                                                                                                                                                                                                                                                                                                                                                                                                                                                                                                                                                                                                                                                                                 |
|------------|-------------------------------------------------------------------------------------------------------------------------------------------------------------------------------------------------------------------------------------------------------------------------------------------------------------------------------------------------------------------------------------------------------------------------------------------------------------------------------------------------------------------------------------------------------------------------------------------------------------------------------------------------------------------------------------------------------------------------------------------------------------------------------------------------------------------------------------------------------------------------------------------------------|
| Figure S1  | Synthesis of Ionic liquid (IL)                                                                                                                                                                                                                                                                                                                                                                                                                                                                                                                                                                                                                                                                                                                                                                                                                                                                        |
| Figure S2  | HRMS spectrum of KP-1                                                                                                                                                                                                                                                                                                                                                                                                                                                                                                                                                                                                                                                                                                                                                                                                                                                                                 |
| Figure S3  | HRMS of precursor A                                                                                                                                                                                                                                                                                                                                                                                                                                                                                                                                                                                                                                                                                                                                                                                                                                                                                   |
| Figure S4  | HRMS spectrum for precursor A                                                                                                                                                                                                                                                                                                                                                                                                                                                                                                                                                                                                                                                                                                                                                                                                                                                                         |
| Figure S5  | <sup>13</sup> C NMR spectra of precursor A                                                                                                                                                                                                                                                                                                                                                                                                                                                                                                                                                                                                                                                                                                                                                                                                                                                            |
| Figure S6  | HRMS spectrum of KP-2                                                                                                                                                                                                                                                                                                                                                                                                                                                                                                                                                                                                                                                                                                                                                                                                                                                                                 |
| Figure S7  | <sup>1</sup> H NMR spectra of KP-2                                                                                                                                                                                                                                                                                                                                                                                                                                                                                                                                                                                                                                                                                                                                                                                                                                                                    |
| Figure S8  | <sup>13</sup> C NMR spectra of KP-2                                                                                                                                                                                                                                                                                                                                                                                                                                                                                                                                                                                                                                                                                                                                                                                                                                                                   |
| Figure S9  | HRMS of IL                                                                                                                                                                                                                                                                                                                                                                                                                                                                                                                                                                                                                                                                                                                                                                                                                                                                                            |
| Figure S10 | <sup>1</sup> H NMR spectrum of IL                                                                                                                                                                                                                                                                                                                                                                                                                                                                                                                                                                                                                                                                                                                                                                                                                                                                     |
| Figure S11 | Composite fabricated membranes                                                                                                                                                                                                                                                                                                                                                                                                                                                                                                                                                                                                                                                                                                                                                                                                                                                                        |
| Figure S12 | EDAX spectrum of bare MWCNT                                                                                                                                                                                                                                                                                                                                                                                                                                                                                                                                                                                                                                                                                                                                                                                                                                                                           |
| Figure S13 | EDAX spectrum of IL@MWCNTs                                                                                                                                                                                                                                                                                                                                                                                                                                                                                                                                                                                                                                                                                                                                                                                                                                                                            |
| Figure S14 | TGA-DSC analysis of MWCNTs                                                                                                                                                                                                                                                                                                                                                                                                                                                                                                                                                                                                                                                                                                                                                                                                                                                                            |
| Figure S15 | XPS spectrum of full region                                                                                                                                                                                                                                                                                                                                                                                                                                                                                                                                                                                                                                                                                                                                                                                                                                                                           |
| Figure S16 | Peak table showing the atomic % of elements present in the Hg/IL@MWCNTs composite                                                                                                                                                                                                                                                                                                                                                                                                                                                                                                                                                                                                                                                                                                                                                                                                                     |
| Figure S17 | Relative intensity ratios of D/G, G'/G, and G'/D peaks of pristine MWCNTs, IL@MWCNTs and Hg/IL@MWCNTs.                                                                                                                                                                                                                                                                                                                                                                                                                                                                                                                                                                                                                                                                                                                                                                                                |
| Figure S18 | FTIR spectra of IL and IL@MWCNTs+Hg <sup>2+</sup>                                                                                                                                                                                                                                                                                                                                                                                                                                                                                                                                                                                                                                                                                                                                                                                                                                                     |
| Figure S19 | (A), (B), (C), (D) and (E) Bright field FE-SEM images of Hg/IL@MWCNTs, Elemental mapping of Hg/IL@MWCNTs and (F) EDAX of Hg/IL@MWCNTs                                                                                                                                                                                                                                                                                                                                                                                                                                                                                                                                                                                                                                                                                                                                                                 |
| Figure S20 | (A) Comparative cyclic voltammetry graphs of bare GCE, MWCNTs@GCE, IL/GCE, IL@MWCNTs/GCE and Hg/IL@MWCNTs/GCE, (B) EIS plot and cyclic voltammetry profiles of bare GCE, IL@MWCNTs/GCE and Hg/IL@MWCNTs/GCE at frequency 50 to 3×10 <sup>6</sup> Hz, (C) Cyclic voltammetry graphs of bare GCE, IL@MWCNTs/GCE and Hg/IL@MWCNTs/GCE in mixture of 0.1 M KCl consisting K <sub>3</sub> [Fe(CN) <sub>6</sub> ] and K <sub>4</sub> [Fe(CN) <sub>6</sub> ], (D) Comparative profiles of active surface area with differently modified electrodes, (E) Cyclic voltammetry response of Hg/IL@MWCNTs/GCE with varying scan rates from 20 to 220 mV/s in a mixture 0.1 M KCl consisting of K <sub>3</sub> [Fe(CN) <sub>6</sub> ] and K <sub>4</sub> [Fe(CN) <sub>6</sub> ] solution and (F) Linear regression plot showing relationship between cathodic and anodic peak currents vs square root of scan rate. |
| Figure S21 | (A) Adsorption capacities of IL@MWCNTs with regard to Hg <sup>2+</sup> adsorption and (B) Freundlich adsorption isotherm plots for Hg <sup>2+</sup> adsorption onto IL@MWCNTs.                                                                                                                                                                                                                                                                                                                                                                                                                                                                                                                                                                                                                                                                                                                        |

|                    |                                                                                                                                                                                                             |
|--------------------|-------------------------------------------------------------------------------------------------------------------------------------------------------------------------------------------------------------|
| <b>Figure S22</b>  | Leaching study of IL@MWCNTs for Hg <sup>2+</sup> ion                                                                                                                                                        |
| <b>Figure S23</b>  | Effect of pH on cathodic current after addition of AZM                                                                                                                                                      |
| <b>Figure S24</b>  | DPV response of <b>Hg/IL@MWCNTs</b> (A) nitroaromatics; (B) polysaccharides; (C) Vitamins and (D) Bar graph showing the stability of response of <b>Hg/IL@MWCNTs</b> for AZM detection with number of days. |
| <b>Figure S25</b>  | Mass spectra of degraded AZM products                                                                                                                                                                       |
| <b>Figure S26</b>  | <sup>31</sup> P NMR spectrum obtained for AZM in presence of <b>Hg/IL@MWCNTs</b> catalyst in DMSO-d <sub>6</sub> :D <sub>2</sub> O (35:65 v/v).                                                             |
| <b>Table S1</b>    | AZM determination in water                                                                                                                                                                                  |
| <b>Figure S27</b>  | Contact angle measurement                                                                                                                                                                                   |
| <b>Table S2</b>    | Surface area and pore volume of differently modified membranes                                                                                                                                              |
| <b>Figure S28.</b> | Influence of pH on adsorption kinetics of Hg <sup>2+</sup> ion                                                                                                                                              |
| <b>Table S3</b>    | Degradation efficiency of membrane towards AZM                                                                                                                                                              |
| <b>Figure S29.</b> | Fe-SEM image of (A) pristine membrane, (B) PA/IL@MWCNTs membrane and (C) after filtration of Hg <sup>2+</sup> and AZM.                                                                                      |
| <b>Figure S30.</b> | Influence of pH on AZM adsorption                                                                                                                                                                           |
| <b>Table S4</b>    | Comparison with literature reports                                                                                                                                                                          |

Step - 1

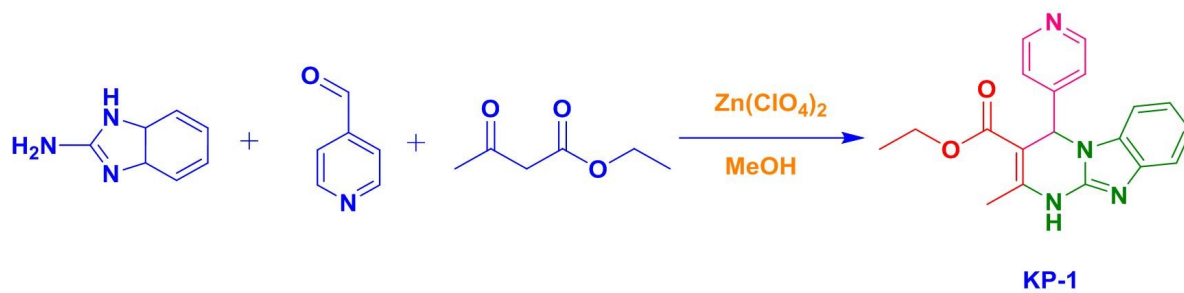

Step - 2

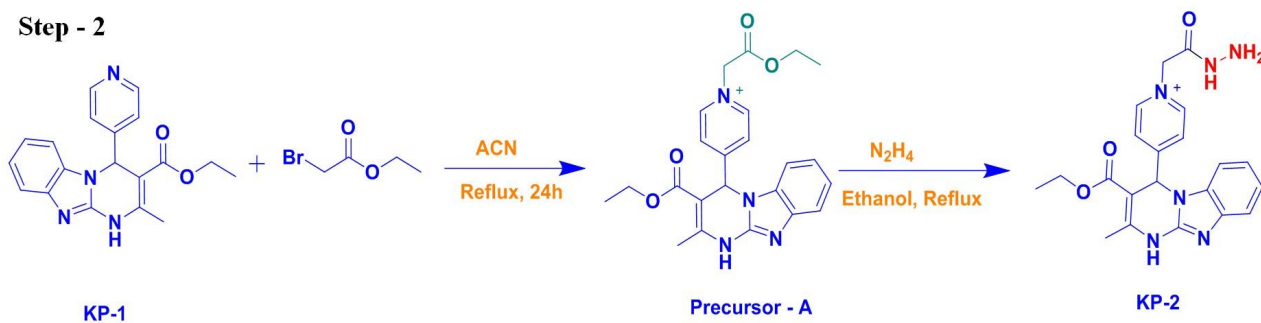

Step - 3

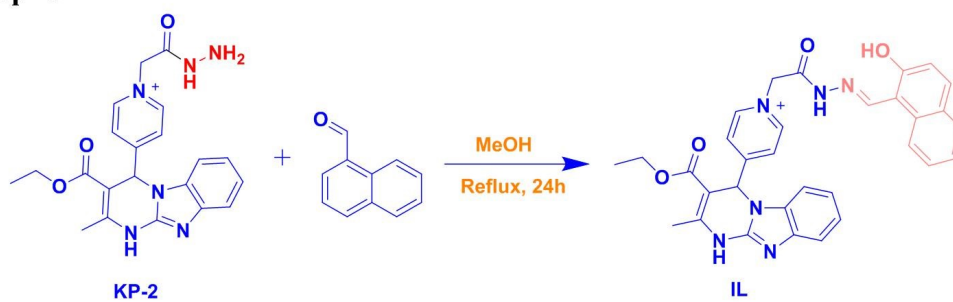

Figure S1. Synthesis of organic cation (IL).

## Single Mass Analysis

Tolerance = 5.0 mDa / DBE: min = -1.5, max = 50.0

Element prediction: Off

Number of isotope peaks used for i-FIT = 3

Monoisotopic Mass, Even Electron Ions

54 formula(e) evaluated with 1 results within limits (up to 50 closest results for each mass)

Elements Used:

C: 19-19 H: 1-100 N: 1-7 O: 1-8

290823\_KK-335 17 (0.197) Cm (17.24)

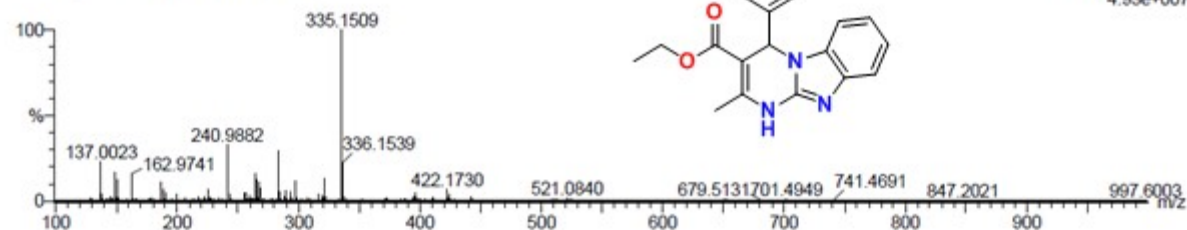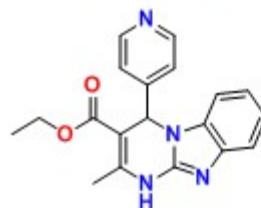1: TOF MS ES+  
4.93e+007

| Mass     | Calc. Mass | mDa | PPM | DBE  | i-FIT  | Norm | Conf (%) | Formula       |
|----------|------------|-----|-----|------|--------|------|----------|---------------|
| 335.1509 | 335.1508   | 0.1 | 0.3 | 12.5 | 1077.4 | n/a  | n/a      | C19 H19 N4 O2 |

**Figure S2.** HRMS spectrum of KP-1  
 HRMS (ESI,m/z): calculated for C<sub>19</sub>H<sub>18</sub>N<sub>4</sub>O<sub>2</sub> [M+1], 335.1508, found 335.1509

## Elemental Composition Report

## Single Mass Analysis

Tolerance = 5.0 mDa / DBE: min = -1.5, max = 50.0

Element prediction: Off

Number of isotope peaks used for i-FIT = 3

Monoisotopic Mass, Even Electron Ions

20 formula(e) evaluated with 1 results within limits (up to 50 best isotopic matches for each mass)

Elements Used:

C: 0-23 H: 0-25 N: 0-4 O: 0-4

Sample Name : 13:31:19KK-74

Test Name :

181022-KK-74 17 (0.197)

IITRPR

XEVO G2-XS QTOF

1: TOF MS ES+  
7.93e+006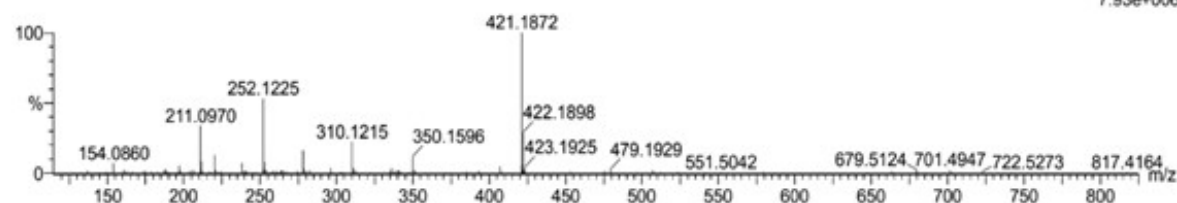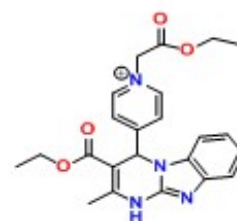

| Mass     | Calc. Mass | mDa  | PPM  | DBE  | i-FIT | Norm | Conf (%) | Formula       |
|----------|------------|------|------|------|-------|------|----------|---------------|
| 421.1872 | 421.1876   | -0.4 | -0.9 | 13.5 | 879.7 | n/a  | n/a      | C23 H25 N4 O4 |

**Figure S3.** HRMS of precursor A  
 HRMS (ESI,m/z): calculated for C<sub>23</sub>H<sub>25</sub>N<sub>4</sub>O<sub>4</sub> [M]<sup>+</sup>, 421.1876, found 421.1872

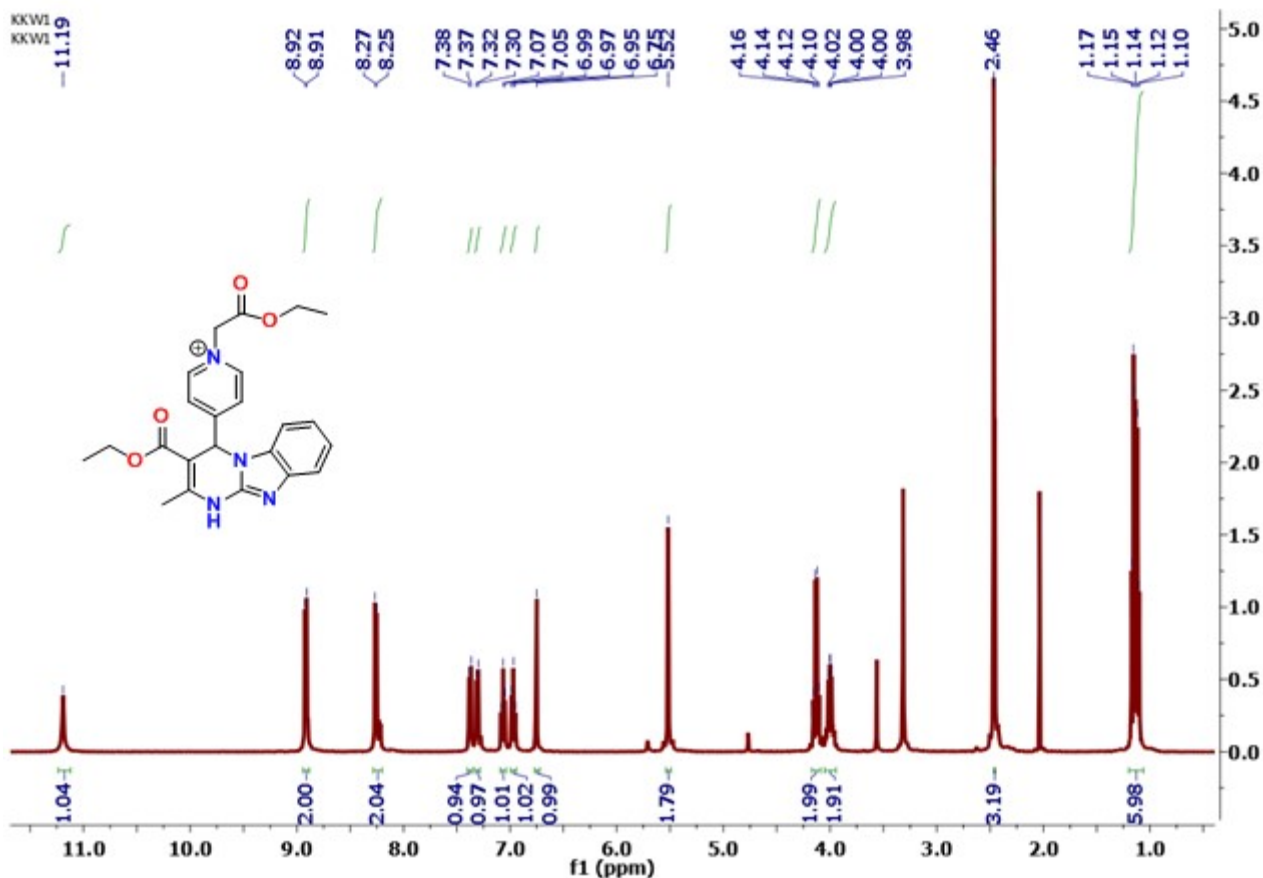

**Figure S4.** HRMS spectrum for precursor A

**<sup>1</sup>H NMR (400 MHz, DMSO-d<sub>6</sub>)-** δ 11.19 (s, NH, 1H), 8.92 (d, Ar-H, 2H), 8.26 (d, Ar-H, 2H), 7.38 (d, Ar-H, 1H), 7.31 (d, Ar-H, 1H), 7.07 (t, Ar-H, 1H), 6.97 (t, Ar-H, 1H), 6.75 (s, 1H), 5.52 (s, 2H), 4.13 (q, 2H), 4.00 (m, 2H), 2.46 (s, 3H), 1.14 (m, 6H).

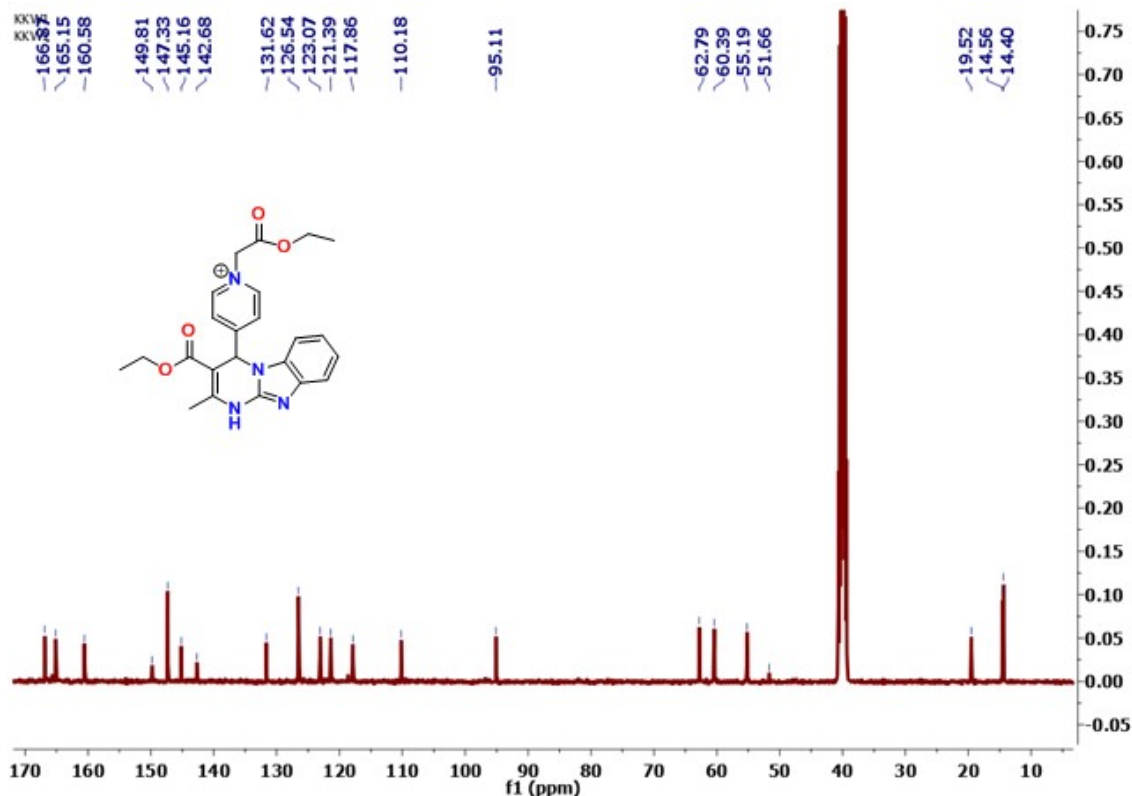

**Figure S5.**  $^{13}\text{C}$  NMR spectra of precursor A

$^{13}\text{C}$  NMR (100 MHz in  $\text{DMSO-d}_6$ ) -  $\delta$  166.8, 165.1, 160.5, 149.8, 147.3, 145.1, 142.6, 131.6, 126.5, 123.0, 121.3, 117.8, 110.1, 95.1, 62.7, 60.3, 55.1, 51.6, 19.5, 14.5, 14.4.

#### Elemental Composition Report

Page 1

#### Single Mass Analysis

Tolerance = 5.0 mDa / DBE: min = -1.5, max = 50.0

Element prediction: Off

Number of isotope peaks used for i-FIT = 3

Monoisotopic Mass, Even Electron Ions

55 formula(e) evaluated with 1 results within limits (up to 50 closest results for each mass)

Elements Used:

C: 21-21 H: 1-100 N: 1-7 O: 1-8

290823\_KK-407 22 (0.240)

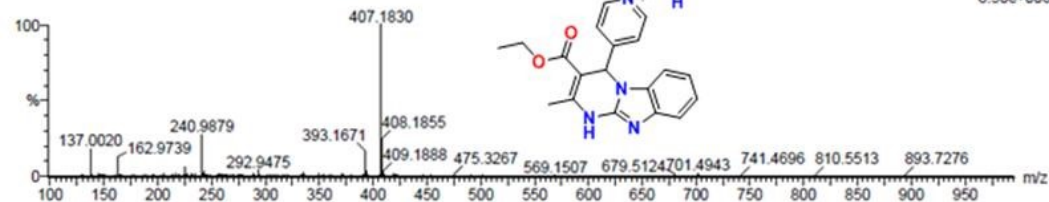

1: TOF MS ES+  
8.50e+006

Minimum: -1.5  
Maximum: 50.0

| Mass     | Calc. Mass | mDa  | PPM  | DBE  | i-FIT | Norm | Conf(%) | Formula                                                       |
|----------|------------|------|------|------|-------|------|---------|---------------------------------------------------------------|
| 407.1830 | 407.1832   | -0.2 | -0.5 | 13.5 | 838.6 | n/a  | n/a     | C <sub>21</sub> H <sub>23</sub> N <sub>6</sub> O <sub>3</sub> |

**Figure S6.** HRMS spectrum of KP-2

HRMS (ESI,m/z): calculated for  $\text{C}_{21}\text{H}_{26}\text{N}_6\text{O}_3$   $[\text{M}]^+$ , 407.1832, found 421.1830

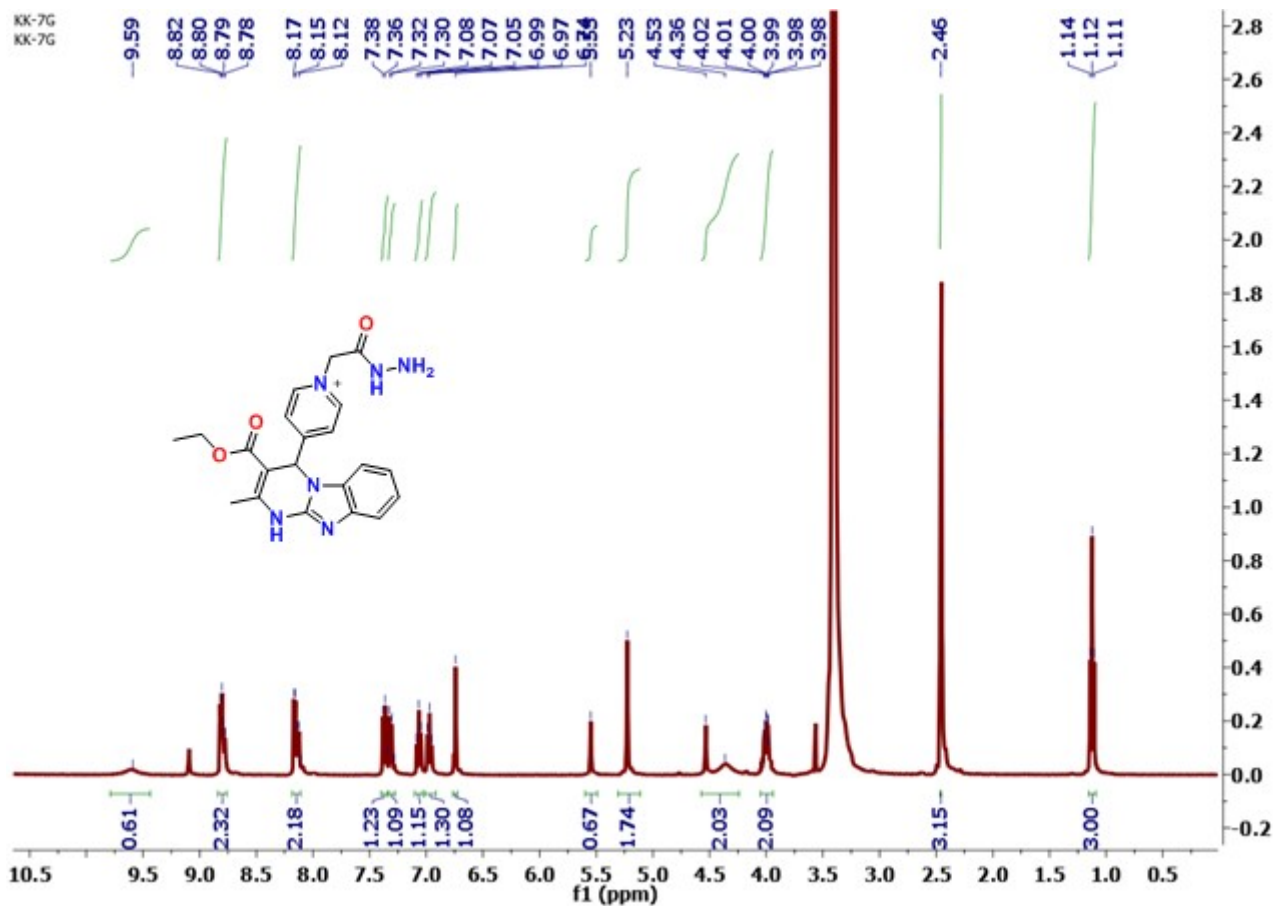

Figure S7. <sup>1</sup>H NMR spectra of KP-2

<sup>1</sup>H NMR (400 MHz in DMSO-d<sub>6</sub>) - δ 9.59 (s, -NH, 1H), 8.82-8.78 (m, Ar-H, 2H), 8.17-8.10 (m, Ar-H, 2H), 7.38-7.35 (t, J= 7.36, Ar-H, 1H), 7.32-7.28 (m, Ar-H, 1H), 7.08-7.05 (t, J= 7.07, Ar-H, 1H), 6.99-6.95 (t, Ar-H, 1H), 6.74 (s, -CH, 1H), 5.55 (s, -NH, 1H), 5.23 (s, CH<sub>2</sub>, 2H), 4.53 (d, -NH, 2H), 4.01-3.98 (q, -CH<sub>2</sub>, 2H), 2.46 (s, CH<sub>3</sub>, 3H), 1.14-1.11 (t, J=1.12, CH<sub>3</sub>, 3H).



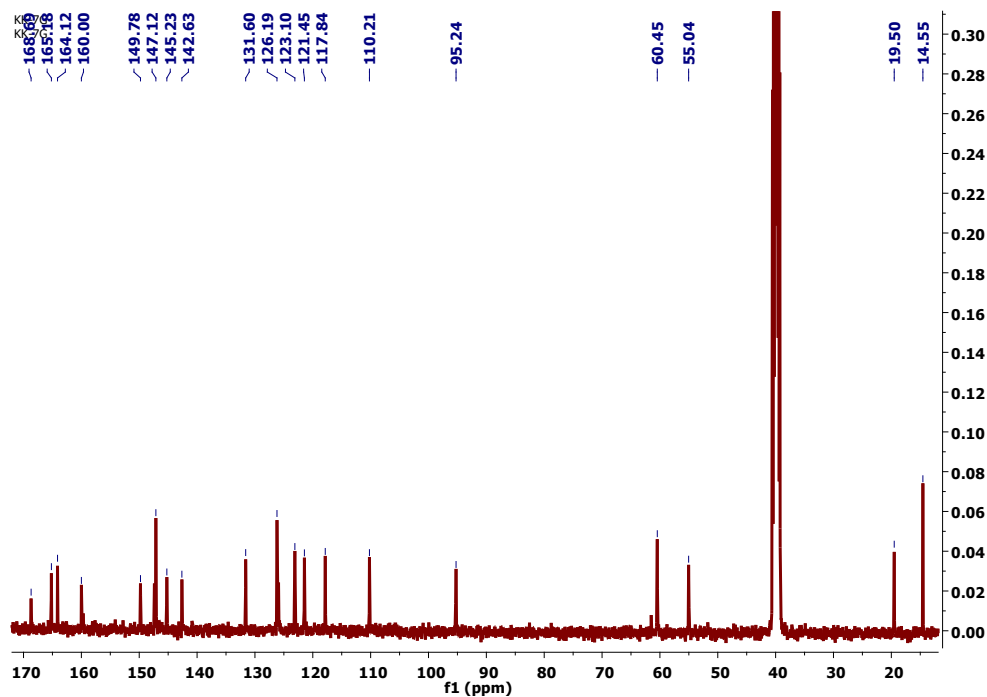

Figure S8.  $^{13}\text{C}$  NMR spectra of KP-2

$^{13}\text{C}$  NMR (100 MHz in  $\text{DMSO-d}_6$ )-  $\delta$  168.6, 165.1, 164.1, 160.0, 149.7, 147.1, 145.2, 142.6, 131.6, 126.1, 123.1, 121.4, 117.8, 110.2, 95.2, 60.4, 55.0, 19.5, 14.5

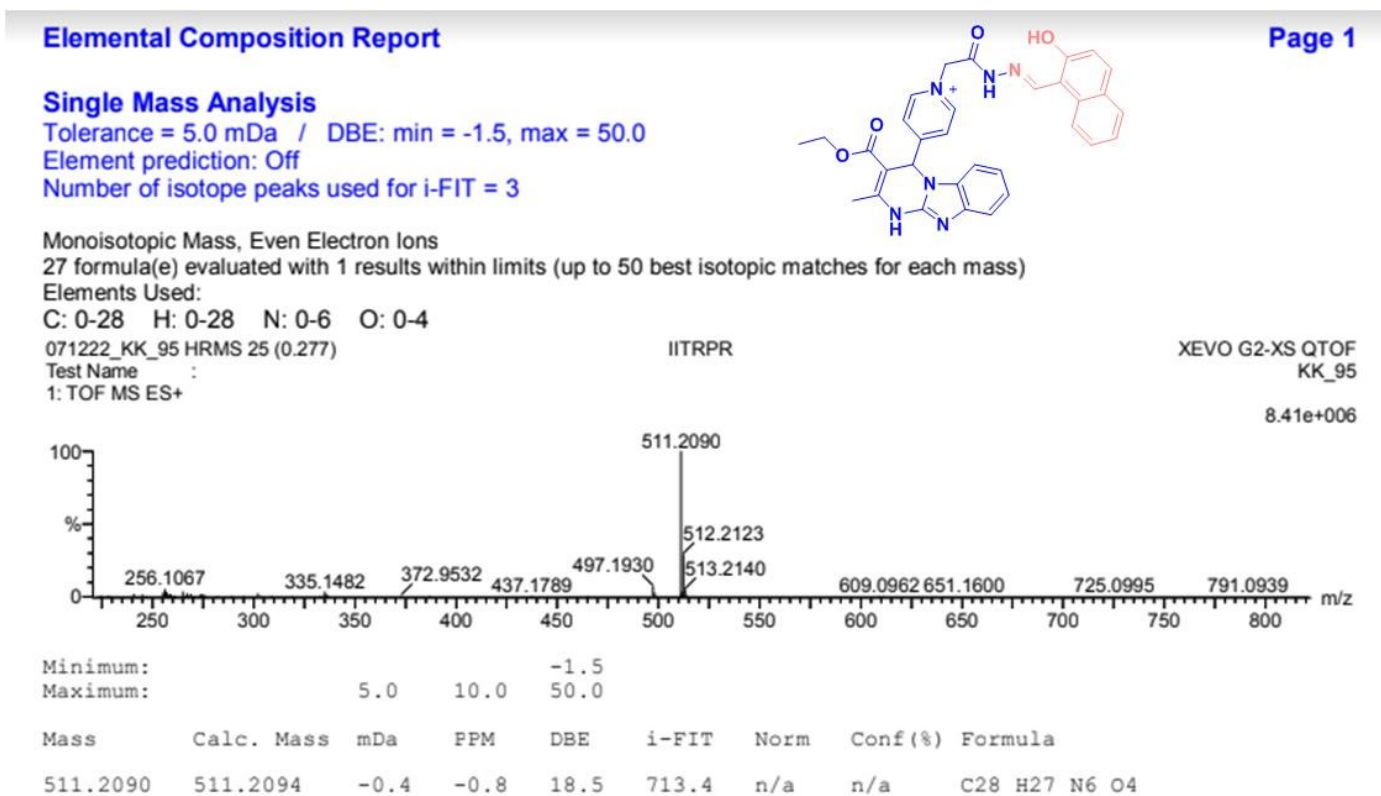

Figure S9 . HRMS of IL

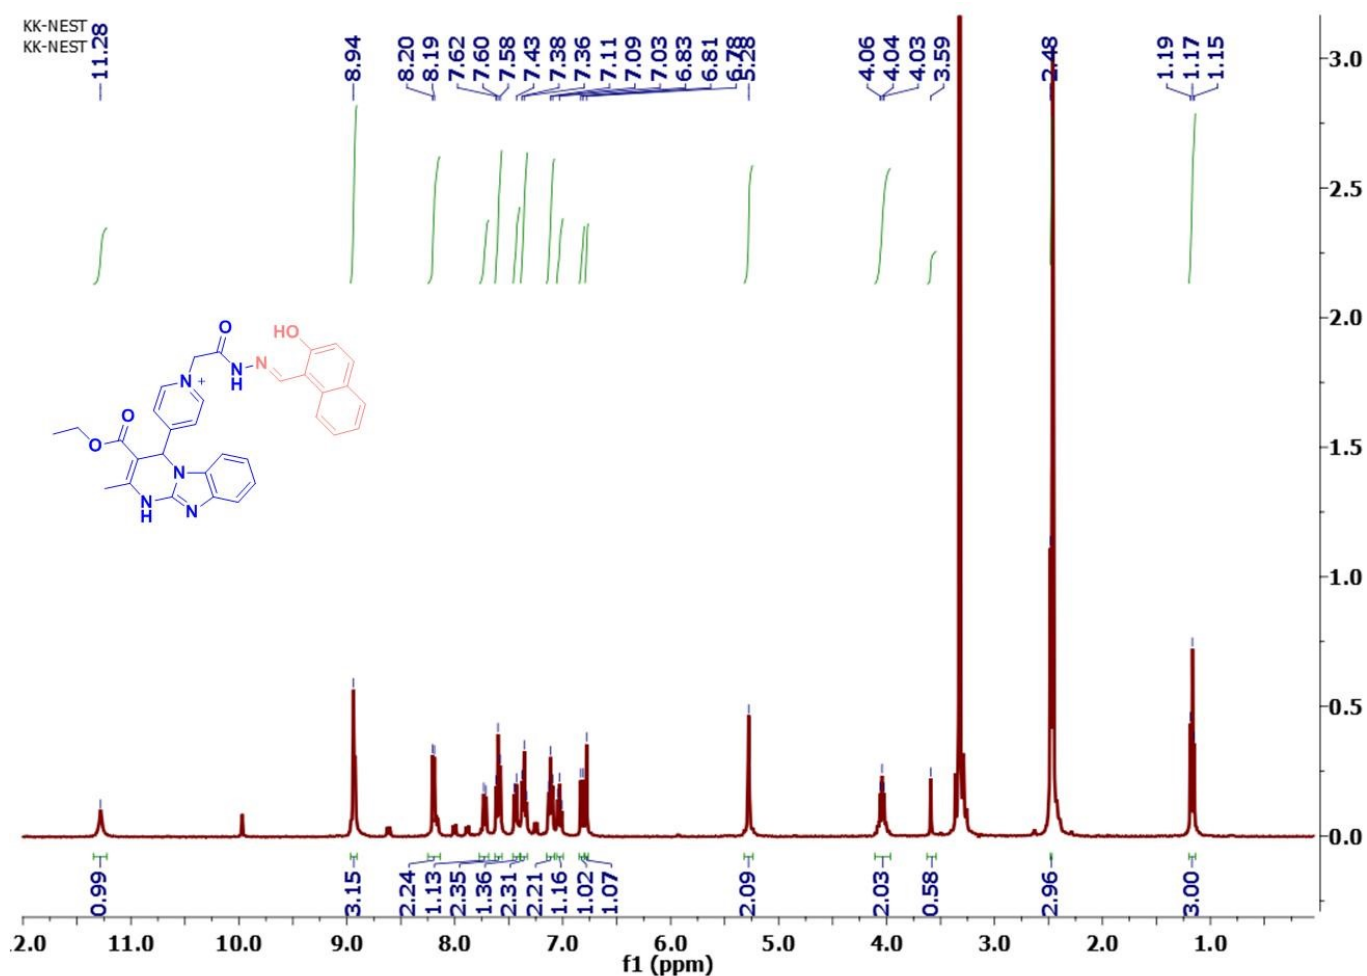

Figure S10.  $^1\text{H}$  NMR spectrum of IL

$^1\text{H}$  NMR (400 MHz in  $\text{DMSO-d}_6$ )-  $\delta$  1.17 (s, 3H), 3.59 (s, 1H, -NH), 4.06-4.03 (m, 2H), 5.28 (s, 1H), 6.83-6.81 (d, 1H), 7.03 (t, 1H), 7.11 (t, 1H), 7.36 (t, 2H), 7.45-7.43 (d, 1H), 7.60 (t, 2H), 7.73-7.71 (d, 1H), 8.20-8.19 (d, 2H), 8.94 (3H, s), 11.28 (s, -OH)

| Membrane                    | PA (wt %) | IL@MWCNTs |
|-----------------------------|-----------|-----------|
| PA                          | 1.0       | 0         |
| PA/IL@MWCNTs <sub>2.5</sub> | 1.0       | 2.5       |
| PA/IL@MWCNTs <sub>5</sub>   | 1.0       | 5         |
| PA/IL@MWCNTs <sub>7.5</sub> | 1.0       | 7.5       |

Figure S11. Composite fabricated membranes

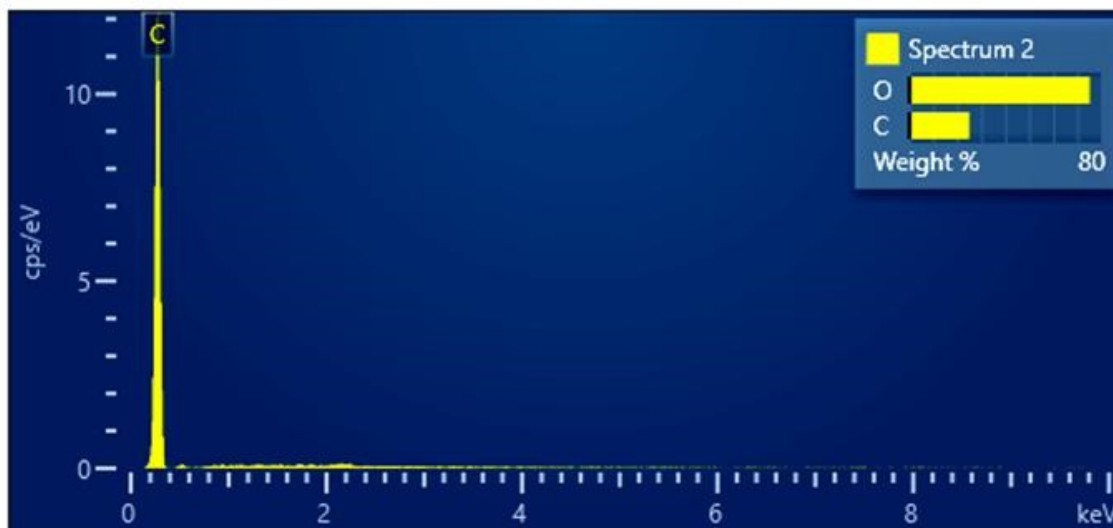

**Figure S12:** EDAX spectrum of bare MWCNT

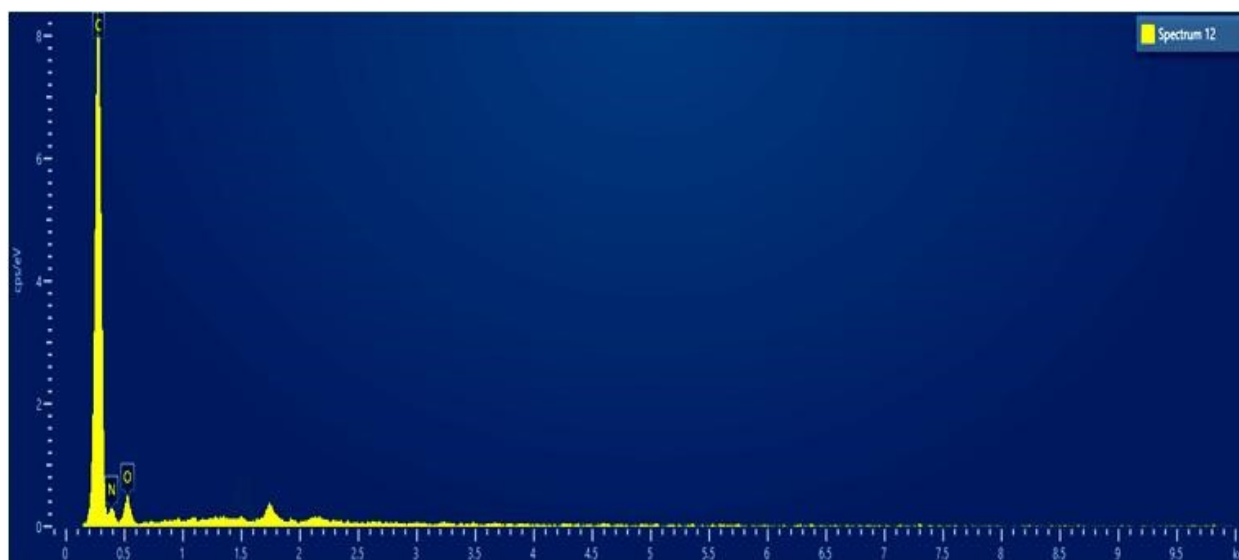

**Figure S13:** EDAX spectrum of IL@MWCNTs

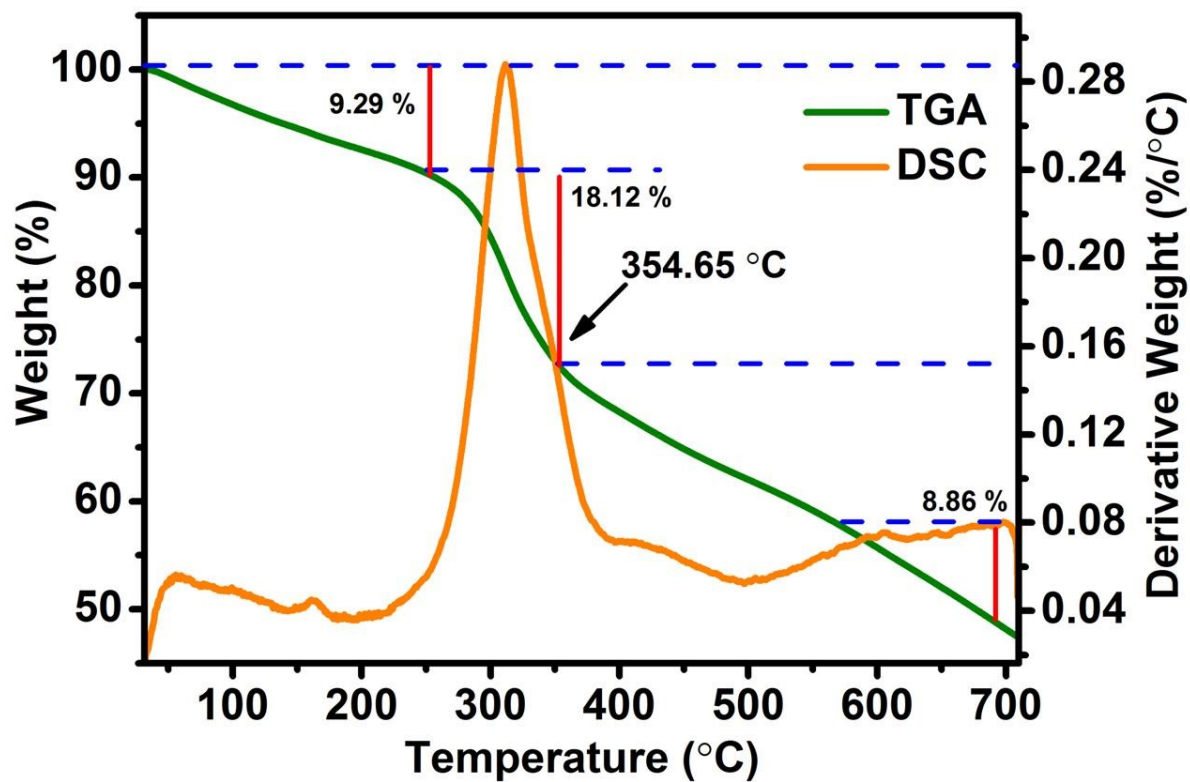

Figure S14. TGA-DSC analysis of MWCNTs

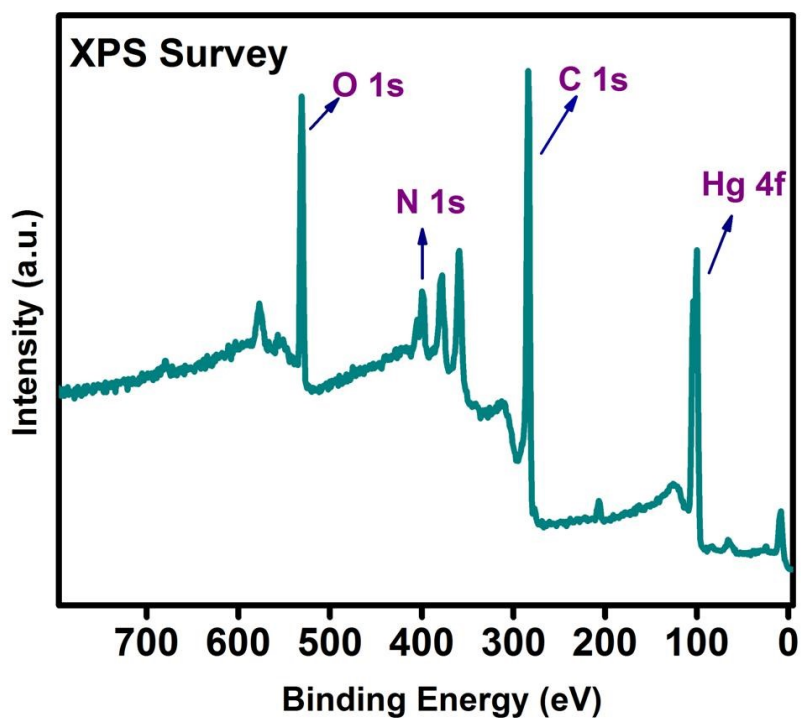

Figure S15. XPS spectrum of full region

| Element | Atomic % |
|---------|----------|
| C 1s    | 70.51    |
| N 1s    | 9.75     |
| O 1s    | 16.62    |
| Hg 4f   | 3.12     |

**Figure S16.** Peak table showing the atomic % of elements present in the **Hg/IL@MWCNTs** composite

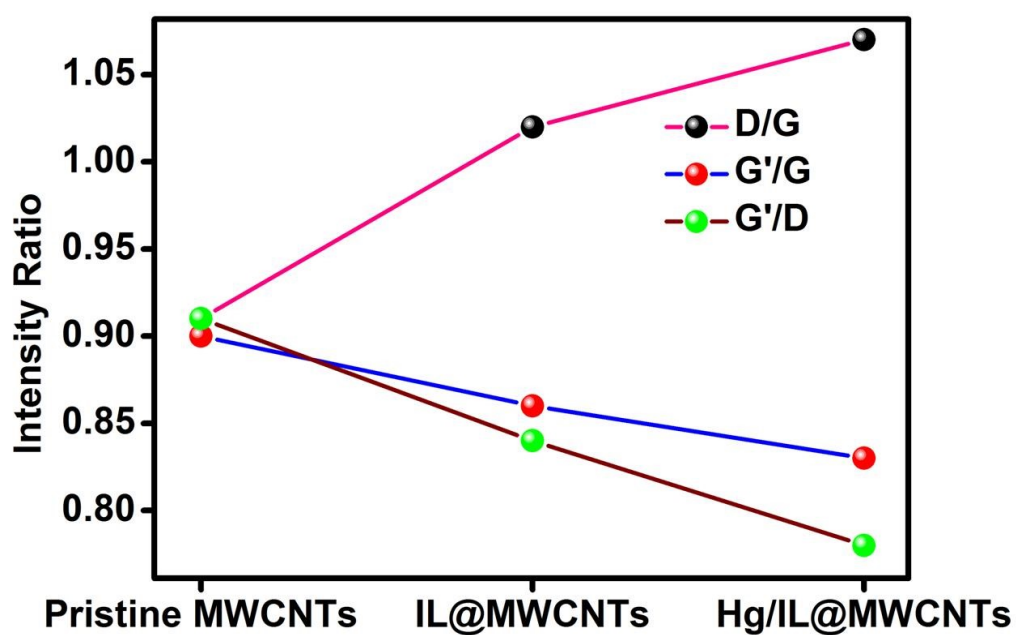

**Figure S17.** Relative intensity ratios of D/G, G'/G, and G'/D peaks of pristine MWCNTs, IL@MWCNTs and Hg/IL@MWCNTs.

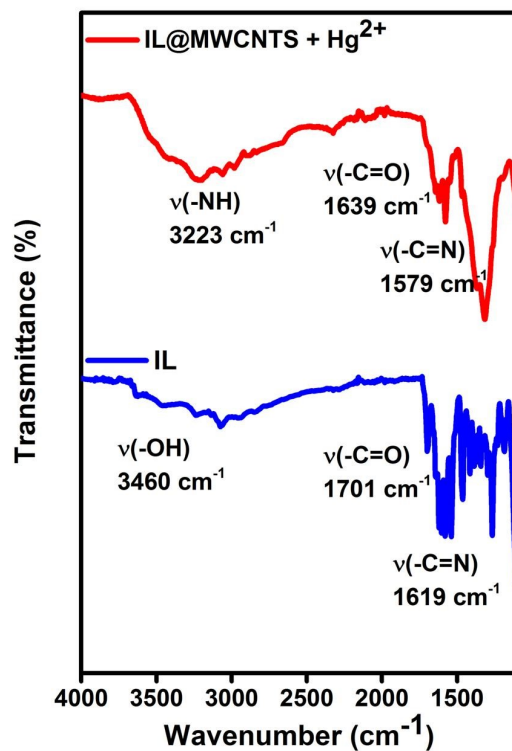

Figure S18. FTIR spectra of IL@MWCNTs and IL@MWCNTs+Hg<sup>2+</sup>.

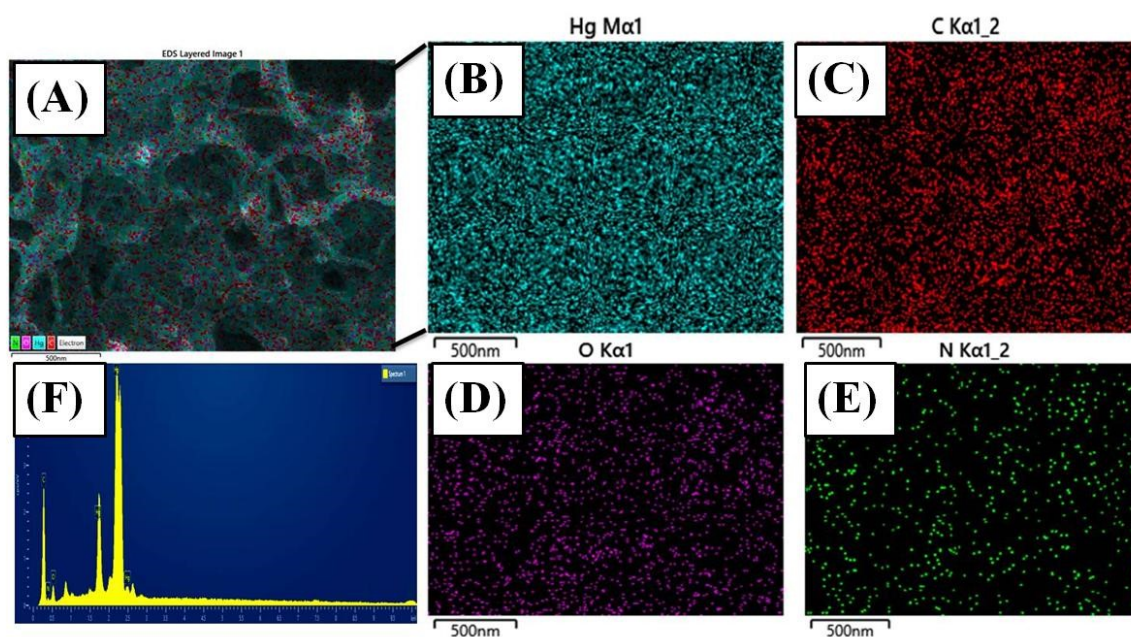

Figure S19. (A), (B), (C), (D) and (E) Bright field FE-SEM images of Hg/IL@MWCNTs, Elemental mapping of Hg/IL@MWCNTs and (F) EDAX of Hg/IL@MWCNTs.



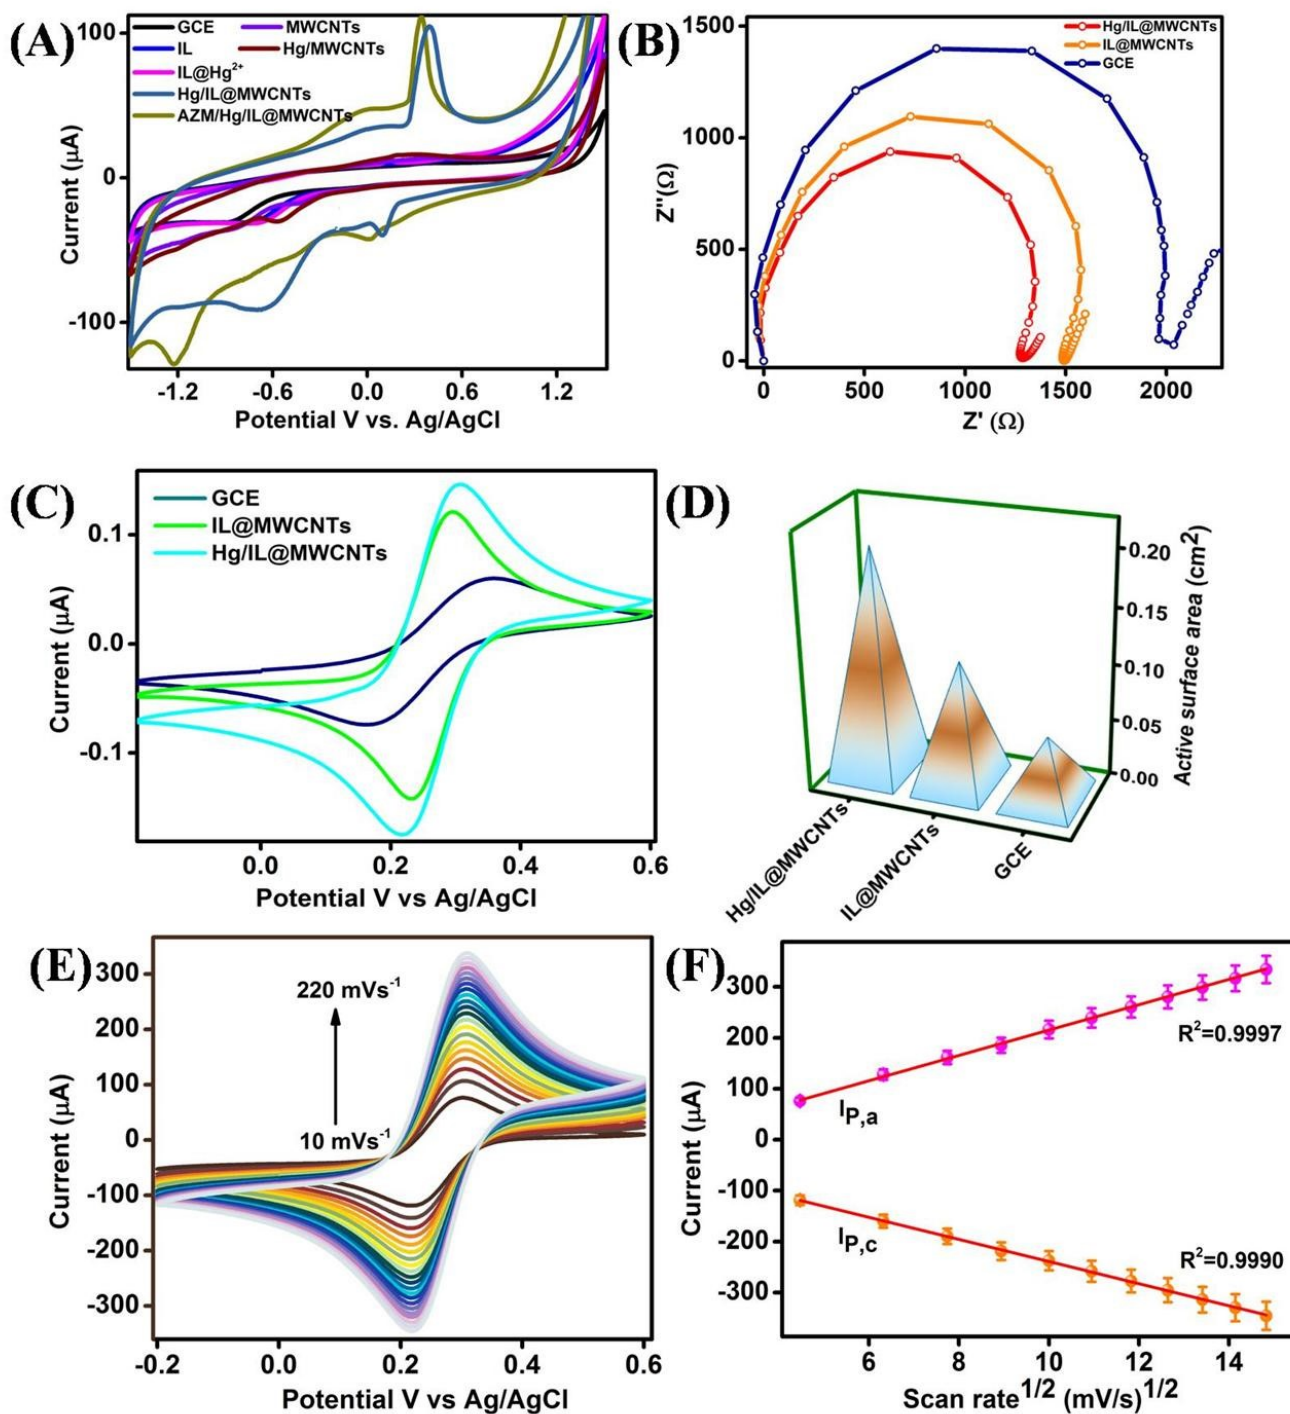

**Figure S20.** (A) Comparative cyclic voltammetry graphs of bare GCE, MWCNTs@GCE, IL/GCE, IL@MWCNTs/GCE and Hg/IL@MWCNTs/GCE, (B) EIS plot and cyclic voltammetry profiles of bare GCE, IL@MWCNTs/GCE and Hg/IL@MWCNTs/GCE at frequency 50 to  $3 \times 10^6$  Hz, (C) Cyclic voltammetry graphs of bare GCE, IL@MWCNTs/GCE and Hg/IL@MWCNTs/GCE in mixture of 0.1 M KCl consisting  $\text{K}_3[\text{Fe}(\text{CN})_6]$  and  $\text{K}_4[\text{Fe}(\text{CN})_6]$ , (D) Comparative profiles of active surface area with differently modified electrodes, (E) Cyclic voltammetry response of Hg/IL@MWCNTs/GCE with varying scan rates from 20 to 220  $\text{mV/s}$  in a mixture 0.1 M KCl consisting of  $\text{K}_3[\text{Fe}(\text{CN})_6]$  and  $\text{K}_4[\text{Fe}(\text{CN})_6]$  solution and (F) Linear regression plot showing relationship between cathodic and anodic peak currents vs square root of scan rate.

### Adsorption capacity of Hg<sup>2+</sup> ions onto IL@MWCNTs

Many current Hg<sup>2+</sup> sensing probes can only detect the heavy-metal ions, but cannot extract them from solution. In the present work, we endowed IL@MWCNTs with adsorptive and separable properties to remove the mercury ions from aqueous solution. To determine the adsorption capacities of the functionalized materials, the IL@MWCNTs (5 mg) samples were added to an aqueous solution containing 5, 10, 25, 40, 50, 100, 150 and 200 ppm different concentrations of Hg<sup>2+</sup>. Then, the solution was stirred for 12 h at a fixed temperature (25 °C). After filtration, the final Hg<sup>2+</sup> concentrations remaining in aqueous solution were determined with AAS (atomic absorption spectrometry). The equilibrium metal ions adsorption capacity was calculated for each Hg<sup>2+</sup> sample using the following expression.

$$q_e = (C_0 - C_e) \times V / m$$

where  $q_e$  is the adsorbent adsorption capacity (mg g<sup>-1</sup>),  $C_0$  and  $C_e$  are the initial and equilibrium concentration of Hg<sup>2+</sup> ions (mg L<sup>-1</sup>),  $m$  is the mass of IL@MWCNTs, and  $V$  is the sample volume (L). The adsorption capacities of IL@MWCNTs with regard to Hg<sup>2+</sup> adsorption are presented in Figure 8. In order to optimize the use of adsorbents, it is important to establish the most appropriate adsorption isotherm. The adsorption results were fitted using Freundlich adsorption isotherm model supporting multilayer adsorption mechanism (Figure 8B). The Freundlich adsorption isotherm is expressed as follows:

$$\log Q_e = \log K_f + 1/n \log C_e \quad \dots\dots\dots (1)$$

where  $q_e$  represents equilibrium adsorption capacity of membrane,  $C_e$  is equilibrium concentration after adsorption,  $k_F$  is the Freundlich isotherm constant and  $n$  is the heterogeneity factor, respectively. The maximum adsorption capacity for Hg<sup>2+</sup> is 152.7 mg g<sup>-1</sup>.

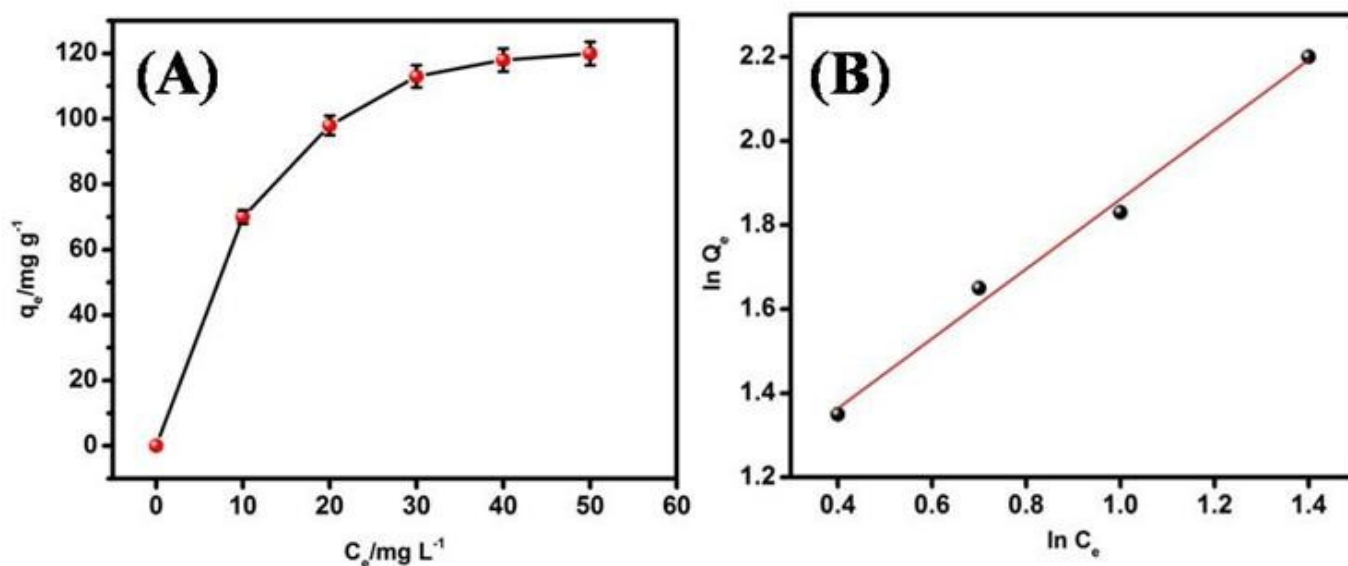

**Figure S21.** (A) Adsorption capacities of IL@MWCNTs with regard to Hg<sup>2+</sup> adsorption and (B) Freundlich adsorption isotherm plots for Hg<sup>2+</sup> adsorption onto IL@MWCNTs.



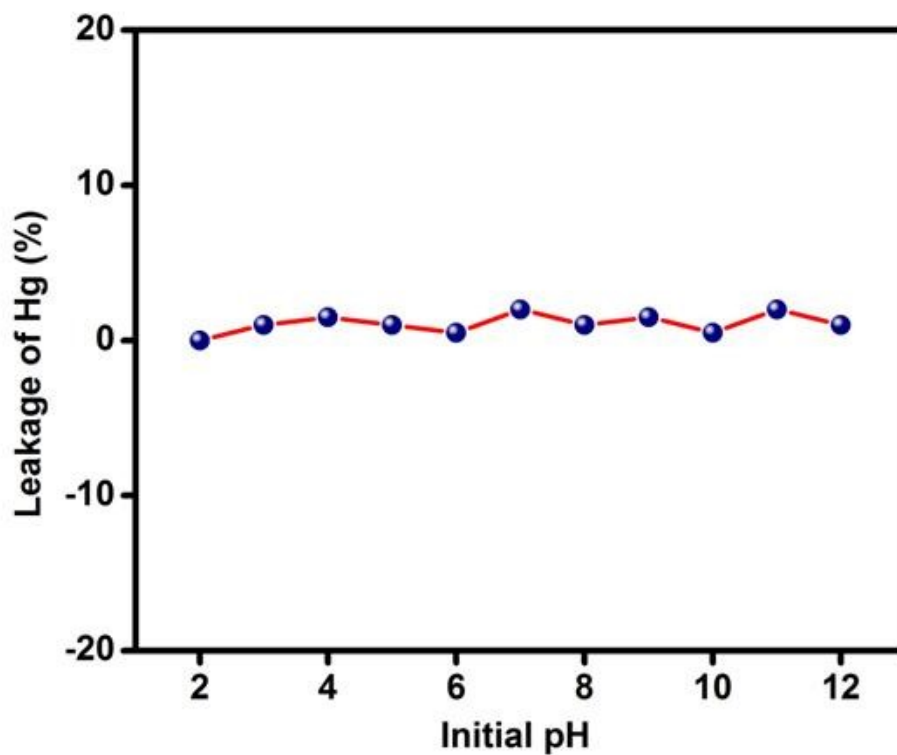

Figure S22. Leaching study of IL@MWCNTs for Hg<sup>2+</sup> ion

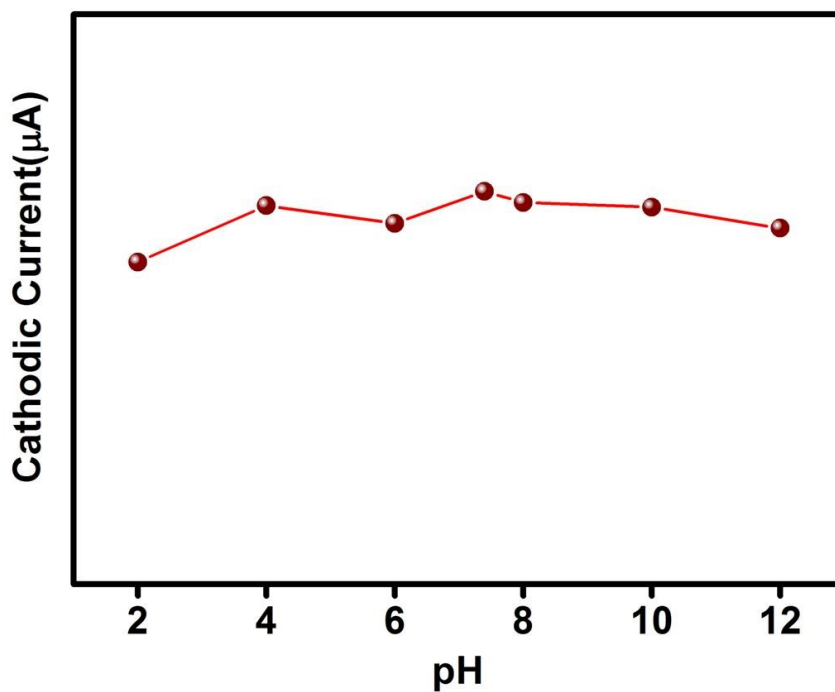

Figure S23. Effect of pH on cathodic current after addition of AZM

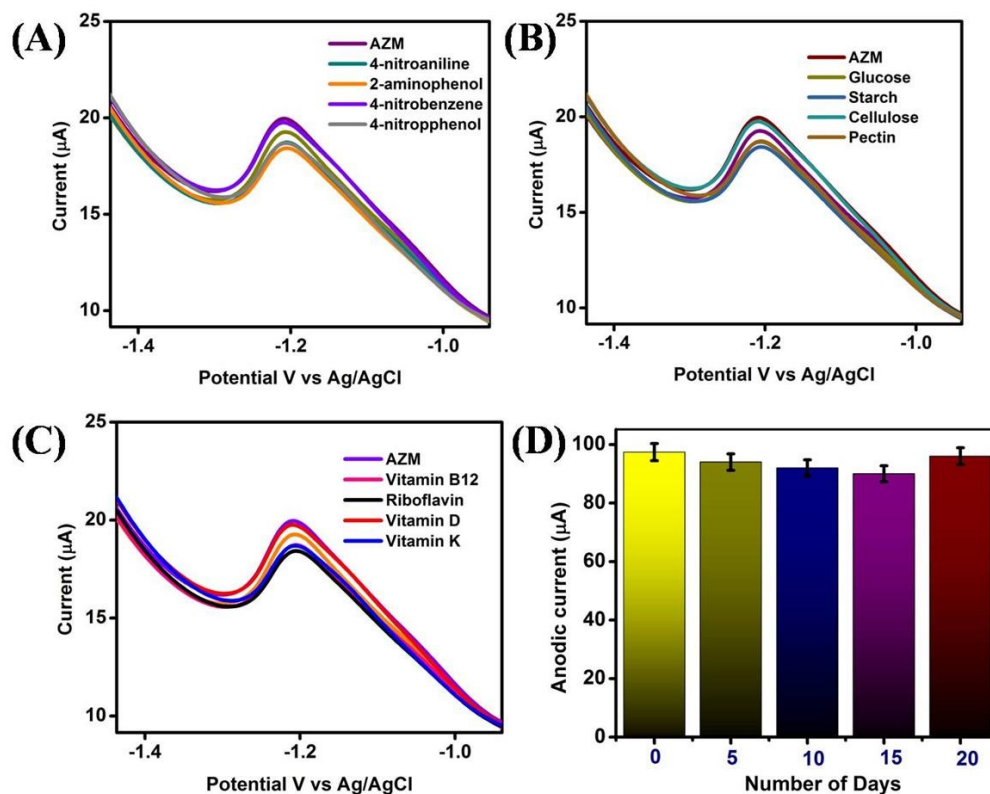

**Figure S24:** DPV response of Hg/IL@MWCNTs (A) nitroaromatics; (B) polysaccharides; (C) Vitamins and (D) Bar graph showing the stability of response of Hg/IL@MWCNTs for AZM detection with number of days.

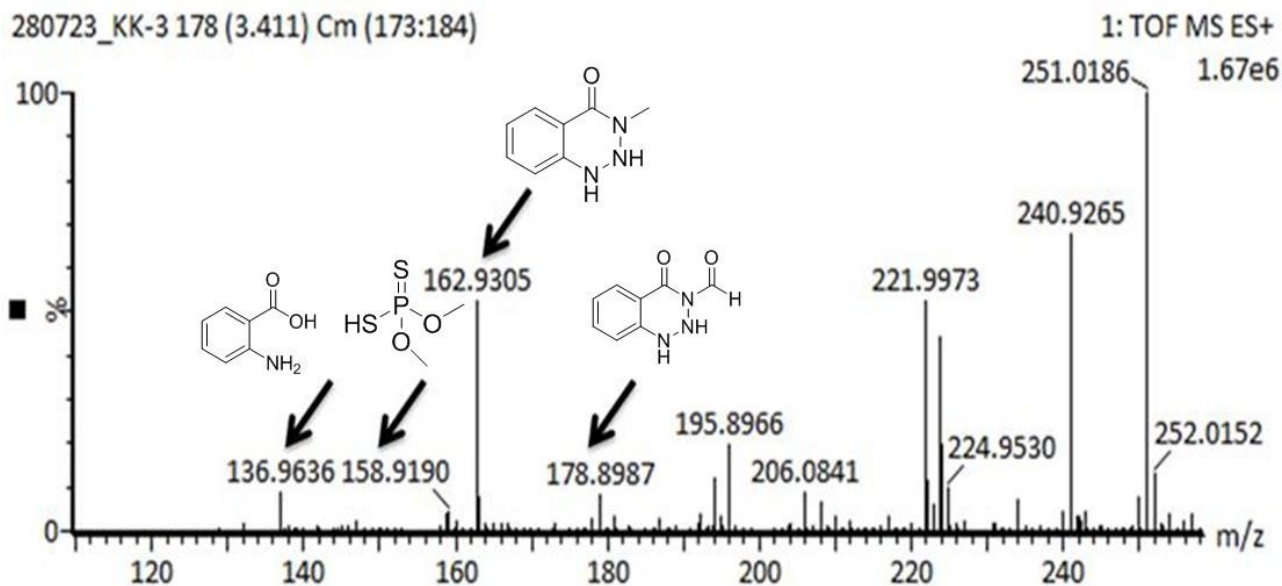

**Figure S25.** Mass spectra of degraded AZM products

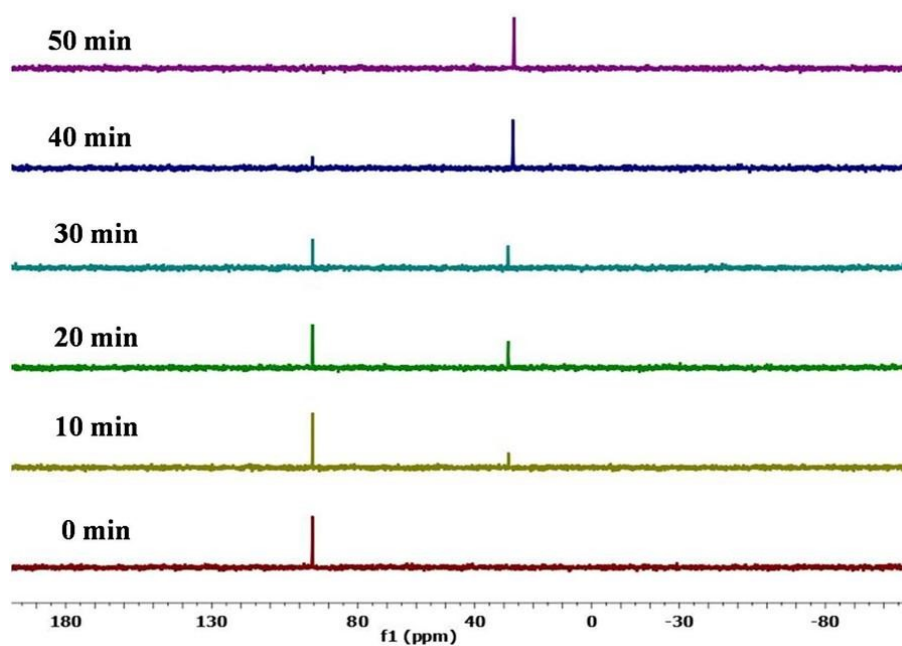

**Figure S26.**  $^{31}\text{P}$  NMR spectrum obtained for AZM in presence of Hg/IL@MWCNTs catalyst in DMSO- $d_6$ : D $_2$ O (35:65 v/v).

**Table S1**

| Sample              | Conc. of spiked samples [ $\mu\text{M}$ ] | Found conc. in samples [ $\mu\text{M}$ ] | Recovery [%] | RSD <sup>a</sup> |
|---------------------|-------------------------------------------|------------------------------------------|--------------|------------------|
| Tap Water           | 10                                        | 9.63                                     | 96.3         | 0.417            |
|                     | 20                                        | 19.96                                    | 99.8         | 0.247            |
|                     | 30                                        | 29.86                                    | 99.5         | 0.103            |
| Agriculture run-off | 10                                        | 10.54                                    | 105.4        | 1.150            |
|                     | 20                                        | 20.11                                    | 100.5        | 1.629            |
|                     | 30                                        | 30.22                                    | 100.7        | 0.527            |
| River Water         | 10                                        | 9.92                                     | 99.2         | 0.364            |
|                     | 20                                        | 19.32                                    | 96.6         | 1.247            |
|                     | 30                                        | 29.19                                    | 97.3         | 0.721            |

<sup>a</sup> Measurements of three experiments (n = 3)

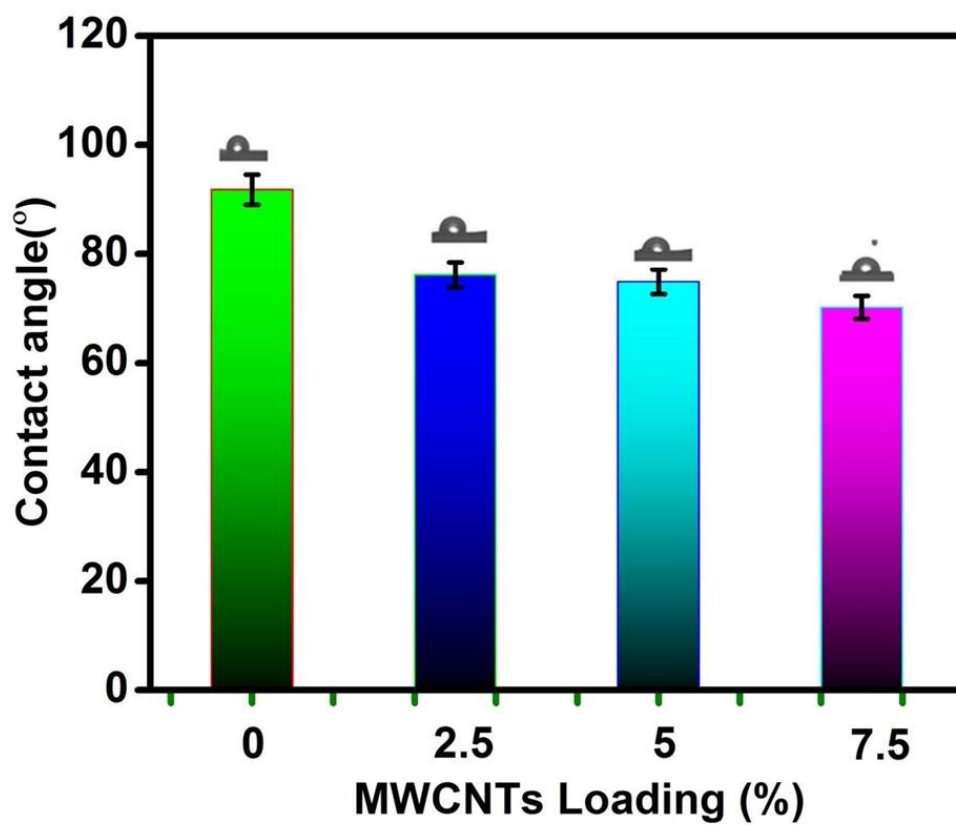

Figure S27: Contact angle measurement

Table S2

| Sample           | $S_{\text{BET}}$ ( $\text{m}^2\text{g}^{-1}$ ) | $V_{\text{total}}$ |
|------------------|------------------------------------------------|--------------------|
| PA               | 6.98                                           | 0.29               |
| PA/IL@MWCNTs-2.5 | 61.31                                          | 0.27               |
| PA/IL@MWCNTs-5   | 74.18                                          | 0.23               |
| PA/IL@MWCNTs-7.5 | 87.68                                          | 0.19               |

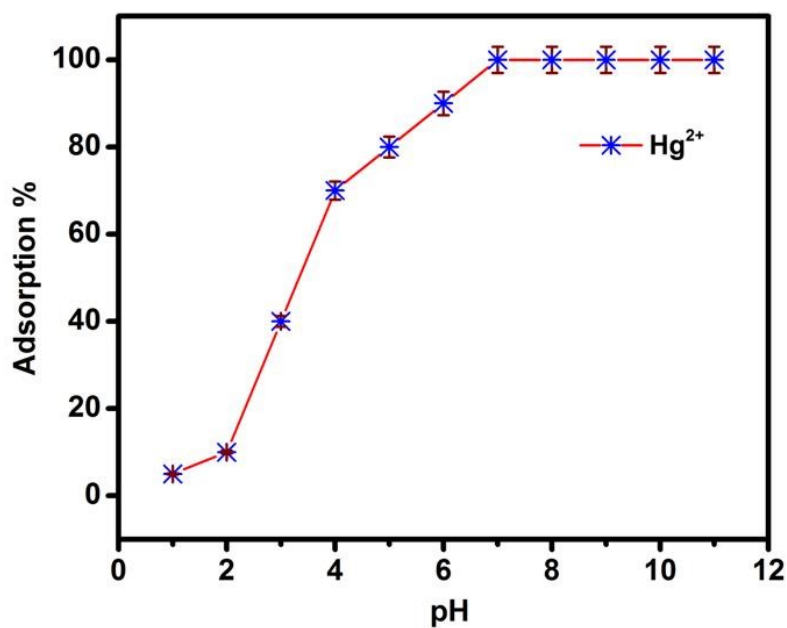

Figure S28. Influence of pH on adsorption kinetics of  $\text{Hg}^{2+}$  ion

Table S3

| Volume of AZM (ml) passed through membrane (PA/IL@MWCNTS/ $\text{Hg}^{2+}$ )<br>(Adsorbed $\text{Hg}^{2+}$ = 19 mg<br>Membrane = $3 \times 3 \text{ cm}^2$ ) | Degradation (%) |
|--------------------------------------------------------------------------------------------------------------------------------------------------------------|-----------------|
| 5 ml                                                                                                                                                         | 99.50           |
| 10 ml                                                                                                                                                        | 97.80           |
| 15 ml                                                                                                                                                        | 96.50           |
| 20 ml                                                                                                                                                        | 93.50           |
| 25 ml                                                                                                                                                        | 90.60           |
| 30 ml                                                                                                                                                        | 89.70           |

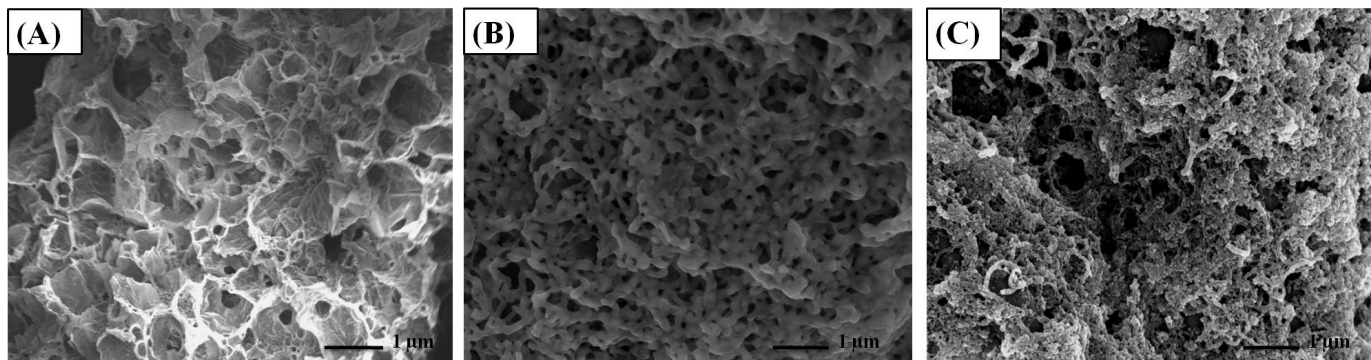

**Figure S29.** FE-SEM image of (A) pristine membrane, (B) PA/IL@MWCNTs membrane and (C) after filtration of Hg<sup>2+</sup> and AZM.

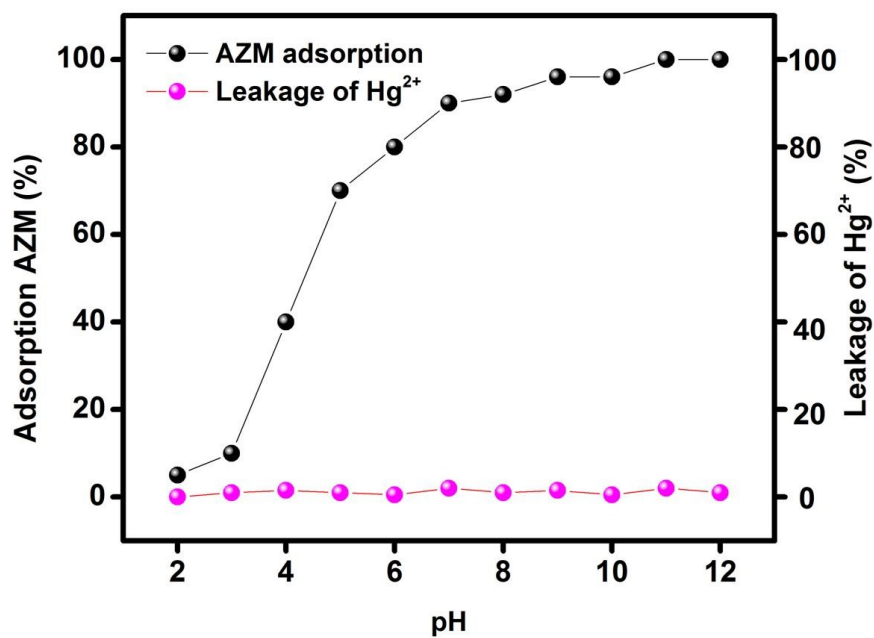

**Figure S30.** Influence of pH on AZM adsorption

Table S4

| S.No.      | Method/Probe                                            | Quantification and Degradation                 | Linear range                               | LOD and degradation %age             | Type of Real sample                          | References          |
|------------|---------------------------------------------------------|------------------------------------------------|--------------------------------------------|--------------------------------------|----------------------------------------------|---------------------|
| 1.         | Electrochemical (Cyclic voltammetry)/ N/Cu-HPC/GCE      | Quantification                                 | 0.5 $\mu\text{M}$ to 60 $\mu\text{M}$      | 0.026 mM                             | Rice                                         | <b>1</b>            |
| 2.         | GC-MS/MS and LC-MS/MS                                   | Multiresidue analysis                          | -                                          | 10 ng/g                              | Avocado Extract                              | <b>2</b>            |
| 3.         | Enhanced chemiluminescence enzyme linked immunosorbent  | Quantification                                 | -                                          | 9.04 $\text{mgL}^{-1}$               | Cucumber, Cabbage                            | <b>3</b>            |
| 4.         | Solar light photo transformation and HPLC               | Detection and degradation                      | -                                          | -                                    | Clay and goethite                            | <b>4</b>            |
| 5.         | SERS/ Graphene-AuNRs                                    | Quantification                                 |                                            | 5 ppm                                | -                                            | 5                   |
| 6.         | Lumniscence/ MOF                                        | Quantification                                 | -                                          | -                                    | Apple and Tomato Juice                       | 6                   |
| 7.         | Fluorescent chemosensor                                 | Quantification                                 | 1 – 100 $\mu\text{M}$                      | 5.16 $\mu\text{M}$                   | RO water, Tap Water and Orange Juice         | 7                   |
| 8.         | HPLC-photodiode array/ Fabric phase sorptive extraction | Quantification                                 | 5-700 $\mu\text{gL}^{-1}$                  | 9.6 $\mu\text{g L}^{-1}$             | Fruit juice, carrot juice and wastewater     | <b>8</b>            |
| 9.         | Stripping Voltammetry                                   | Quantification                                 | -                                          | 65.87 $\mu\text{g kg}^{-1}$          | Honey                                        | <b>9</b>            |
| <b>10.</b> | <b>Electrochemical/ IL@MWCNTs</b>                       | <b>Quantification, degradation and removal</b> | <b>0.20 - 180 <math>\mu\text{M}</math></b> | <b>1.10 <math>\mu\text{M}</math></b> | <b>River water, agricultural run-off and</b> | <b>Present Work</b> |

|  |  |  |  |  |                  |  |
|--|--|--|--|--|------------------|--|
|  |  |  |  |  | <b>tap water</b> |  |
|--|--|--|--|--|------------------|--|

## References

1. Q. Wang, H. Zhangsun, Y. Zhao, Y. Zhuang, Z. Xu, T. Bu, R. Li and L. Wang, Macro-meso-microporous carbon composite derived from hydrophilic metal-organic framework as high performance electrochemical sensor neonicotinoid determination, *J. Hazard. Mater.*, 2021, 411, 125122.
2. N. Chamkasem, L.W. Ollis, T. Harmon, S. Lee, G. Mercer, Analysis of 136 pesticides in avocado using a modified QuEChERS method with LC-MS/MS and GC-MS/MS. *J. Agri. Food Chem.*, 2013, 61, 2315–2329.
3. B. Liu, Y. Ge, Y. Zhang, Y. Song, Y. Chen, S. Wang, Development of a simplified enhanced chemiluminescence enzyme linked immunosorbent assay (ECL-ELISA) for the detection of phosmet, azinphos-methyl and azinphos-ethyl residues in vegetable samples, *Anal. Methods*. 2013, 5, 5938–5943.
4. M. Menager, M. Sarakha, Simulated solar light photo-transformation of organophosphorus azinphos methyl at the surface of clays and goethite. *Environ. Sci. Technol.* 2013, 47, 765–772.
5. T. Nguyen, Z. Zhang, A. Mustapha, H. Li, M. Lin, Use of Graphene and Gold Nanorods as Substrates for the Detection of Pesticides by Surface Enhanced Raman Spectroscopy, *J. Agric. Food Chem.* 2014, 62, 43, 10445–10451.
6. D. Singha, P. Majee, S. Mandal, S. Mondal, P. Mahata, Detection of Pesticides in Aqueous Medium and in Fruit Extracts Using a Three-Dimensional Metal–Organic Framework: Experimental and Computational Study, *Inorg. Chem.* 2018, 57, 19, 12155–12165.
7. M. Bhattu, A. Wani, M. Verma, P. Bharatam, D. Kathuria, J. Gandara, A selective turn-on fluorescent chemosensor 1,1-diaminozine for azinphos-methyl, *Journal of photochemistry and photobiology A: Chemistry*, 2023, 437, 114476.
8. H. Ulusoy, M. Dabbagh, M. Locatelli, S. Ulusoy, A. Kabir, M. Farajzadeh, Azinphos-methyl and chlorfenvinphos pesticides determination using fabric phase sorptive extraction followed by high performance liquid chromatography-photodiode array detector, *Microchemical Journal* 2023, 191, 108789.
9. C. Tsiafoulis, C. Nanos, Determination of azinphos-methyl and parathion-methyl in honey by stripping voltammetry, *Electrochimica Acta*, 2010, 56 (1), 566-574.
